# Supplementary material
Source: MDPI journal article supplement (https://www.mdpi.com/2073-4441/15/20/3537)
Supplement: s1 [file s1]

# Edge of Field Runoff Analysis following Grazing and Silvicultural Best Management Practices in Northeast Texas

Kevin Wagner <sup>1</sup> , Lucas Gregory <sup>2</sup> , Jason A. Gerlich <sup>2,\*</sup> , Edward C. Rhodes <sup>2</sup> , Stephanie deVilleneuve <sup>2</sup> 

<sup>1</sup> Oklahoma Water Resources Center, 501 Athletic Ave, Stillwater, OK 74078, USA; water@okstate.edu

<sup>2</sup> Texas A&M AgriLife Research, Texas Water Resources Institute, 1001 Holleman Drive East, College Station, TX 77843, USA; twri@tamu.edu

\* Author to whom correspondence should be addressed. : jason.gerlich@ag.tamu.edu

Table S1. Nutrient (kg/ha) and *E. coli* (MPN/100mL) loads for each sampling location. Letter A indicates prescribed grazing sites and letter B indicates silviculture sites.

| Site |          | Loading kg/ha |        |        |        |          | MPN/ha         |
|------|----------|---------------|--------|--------|--------|----------|----------------|
|      |          | NNN           | TKN    | OP     | P      | TSS      | <i>E. coli</i> |
| 1A   | Total    | 1.77          | 19.34  | 11.97  | 13.28  | 144.75   | 4.67E+12       |
|      | Mean     | 0.0982        | 1.2891 | 0.6651 | 0.8856 | 12.063   | 3.34E+11       |
|      | Median   | 0.0413        | 0.3433 | 0.2768 | 0.3365 | 6.138    | 1.21E+11       |
|      | SD       | 0.2337        | 2.0107 | 0.98   | 1.1607 | 13.971   | 5.25E+11       |
|      | <i>n</i> | 18            | 15     | 18     | 15     | 12       | 14             |
| 2A   | Total    | 0.2           | 1.63   | 1.27   | 1.37   | 244.28   | 1.57E+10       |
|      | Mean     | 0.0399        | 0.3262 | 0.2543 | 0.2746 | 48.856   | 3.13E+09       |
|      | Median   | 0.012         | 0.2449 | 0.1307 | 0.1462 | 11.387   | 2.62E+09       |
|      | SD       | 0.0562        | 0.3702 | 0.3234 | 0.3246 | 92.899   | 1.42E+09       |
|      | <i>n</i> | 5             | 5      | 5      | 5      | 5        | 5              |
| 3A   | Total    | 2.23          | 8.11   | 0.13   | 0.64   | 186.05   | 9.18E+10       |
|      | Mean     | 0.2031        | 0.7375 | 0.0122 | 0.0583 | 20.673   | 8.34E+09       |
|      | Median   | 0.1221        | 0.4389 | 0.006  | 0.0474 | 4.7515   | 6.09E+09       |
|      | SD       | 0.1911        | 0.7256 | 0.0127 | 0.0624 | 40.894   | 8.01E+09       |
|      | <i>n</i> | 11            | 11     | 11     | 11     | 9        | 11             |
| 4A   | Total    | 1.66          | 4.76   | 0.12   | 0.43   | 167.29   | 1.33E+11       |
|      | Mean     | 0.2365        | 0.6803 | 0.0177 | 0.0613 | 41.823   | 1.90E+10       |
|      | Median   | 0.1061        | 0.4928 | 0.0109 | 0.0518 | 36.461   | 5.49E+09       |
|      | SD       | 0.2784        | 0.7135 | 0.0205 | 0.0551 | 40.55    | 2.38E+10       |
|      | <i>n</i> | 7             | 7      | 7      | 7      | 4        | 7              |
| 1B   | Total    | 1.09          | 13.69  | 8.63   | 9.09   | 155.73   | 1.62E+12       |
|      | Mean     | 0.0643        | 0.8554 | 0.5395 | 0.6063 | 11.979   | 1.27E+11       |
|      | Median   | 0.0403        | 0.2996 | 0.2397 | 0.3167 | 7.6489   | 5.75E+10       |
|      | SD       | 0.0661        | 1.164  | 0.6415 | 0.6579 | 12.71    | 2.12E+11       |
|      | <i>n</i> | 17            | 16     | 16     | 15     | 13       | 13             |
| 2B   | Total    | 0.63          | 2.80   | 1.57   | 1.63   | 20.49    | 5.11E+11       |
|      | Mean     | 0.0528        | 0.28   | 0.1309 | 0.1629 | 2.9271   | 7.30E+10       |
|      | Median   | 0.0384        | 0.1523 | 0.0426 | 0.0992 | 1.9674   | 3.95E+09       |
|      | SD       | 0.0661        | 0.3134 | 0.2046 | 0.1934 | 2.8429   | 1.84E+11       |
|      | <i>n</i> | 12            | 10     | 12     | 10     | 7        | 7              |
| 3B   | Total    | 0.56          | 4.59   | 2.93   | 3.21   | 43.72    | 1.20E+12       |
|      | Mean     | 0.0264        | 0.2548 | 0.1545 | 0.1782 | 3.6437   | 8.56E+10       |
|      | Median   | 0.0136        | 0.1426 | 0.0775 | 0.1368 | 2.0821   | 5.60E+09       |
|      | SD       | 0.0337        | 0.3044 | 0.2355 | 0.2292 | 3.8691   | 2.04E+11       |
|      | <i>n</i> | 21            | 18     | 19     | 18     | 12       | 14             |
| 4B   | Total    | 2.66          | 21.71  | 9.71   | 10.72  | 1,046.82 | 2.43E+13       |
|      | Mean     | 0.1109        | 0.9044 | 0.4222 | 0.4466 | 55.096   | 1.28E+12       |
|      | Median   | 0.0658        | 0.3557 | 0.1216 | 0.1469 | 12.262   | 1.05E+11       |
|      | SD       | 0.2284        | 1.6732 | 0.6804 | 0.7509 | 94.918   | 4.11E+12       |
|      | <i>n</i> | 24            | 24     | 23     | 24     | 19       | 18             |

Table S2. Linear regression results of treatment effect on variable .

| Variable                 | Treatment    | Adjusted R <sup>2</sup> | P-Value  |
|--------------------------|--------------|-------------------------|----------|
| Runoff                   | Grazing      | .71                     | 0.50     |
|                          | Silviculture | .16                     | 0.45     |
| Total Suspended Sediment | Grazing      | .67                     | 0.00253* |
|                          | Silviculture | .61                     | 0.85     |
| <i>E. coli</i>           | Grazing      | .49                     | 0.06210  |
|                          | Silviculture | .38                     | 0.47     |
| TKN                      | Grazing      | .85                     | 0.00246* |
|                          | Silviculture | .86                     | 0.00144* |
| NNN                      | Grazing      | .55                     | 0.02080* |
|                          | Silviculture | .37                     | 0.00844* |
| P                        | Grazing      | .70                     | 0.87     |
|                          | Silviculture | .61                     | 0.09912  |
| OP                       | Grazing      | .73                     | 0.24     |
|                          | Silviculture | .54                     | 0.01250* |

\* Denotes significance  $p < .05$ .

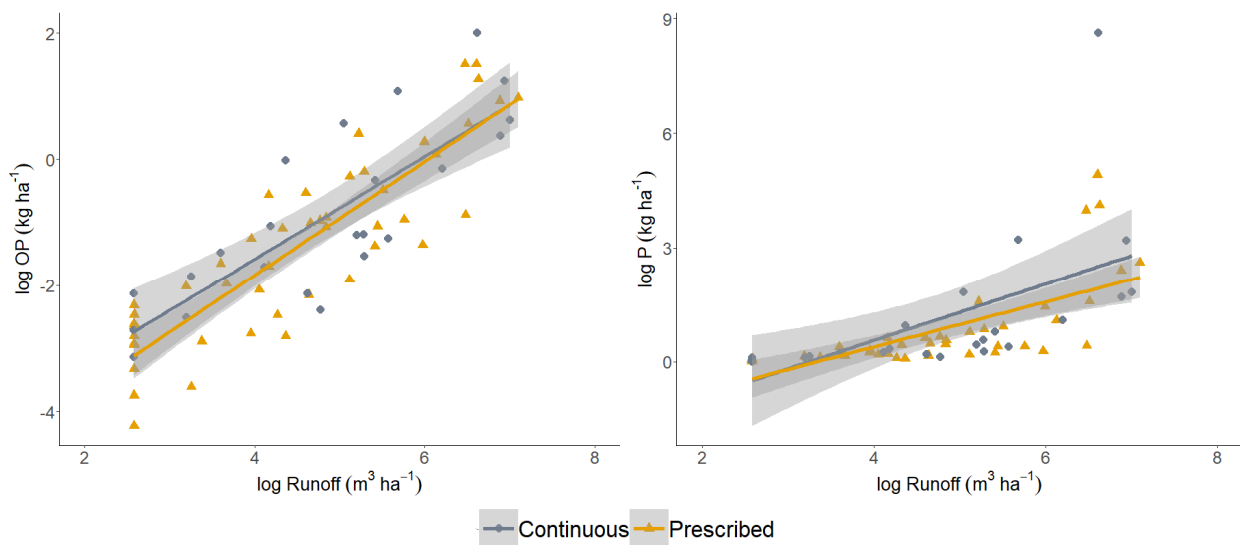

Figure S1. Results from a general linear model of prescribed versus continuous grazing for nutrients, Ortho-Phosphate (OP) and Total Phosphate (P) loads ( $\text{kg ha}^{-1}$ ), per storm runoff volume ( $\text{m}^3 \text{ha}^{-1}$ ) during the project sampling period. Orange triangles and lines represent prescribed grazing while gray squares and lines represent continuous grazing. The grey shading represents the 95% confidence interval.

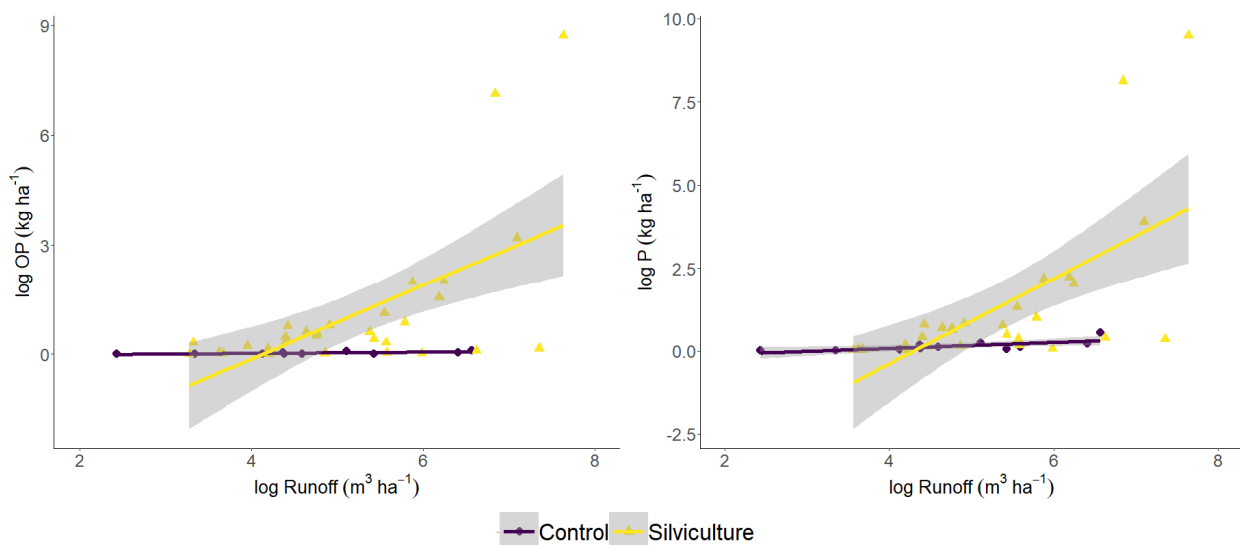

Figure S2. Results from a general linear model of natural forest revegetation (control) versus silvicultural treatments for nutrients, Ortho-phosphate (OP) and Total Phosphate (P) loads ( $\text{kg ha}^{-1}$ ), per storm runoff volume ( $\text{m}^3 \text{ha}^{-1}$ ) during the project sampling period. Yellow triangles and lines represent silviculture while purple squares and lines represent control. The grey shading represents the 95% confidence interval.
